# Supplementary material
Source: publisher site journal article supplement (https://www.spandidos-publications.com/7573/downloadSupplementary)
Supplement: Supplementary file 1 [file downloadSupplementary]

## Sheet: Table SV
Table SV. hub-FRDEGs selected by the LASSO algorithm.
Gene	s1
(Intercept)	-2.65244
PPARG	0
HMOX1	-0.0019623
TGFB1	-0.0267856
TLR4	0
MAPK3	0
CAV1	0
ATM	-0.0534461
HSPB1	0
TIMP1	0.0010012
CDKN1A	0
TXN	0.0287437
MAPK14	0
FTH1	0
CTSB	0
ATF3	0.128052
PRDX1	0.0708004
LCN2	0
NEDD4	0
FTL	0.000838577
STEAP3	2.32501
IDO1	0
MUC1	3.04893
DPP4	-0.351816
CBS	0.0690573
FURIN	0
CDC25A	0
ALOX15	-0.0459937
SOCS1	0.0256963
TERT	-0.214084
SAT1	0
GDF15	1.77729
ALOX5	0
FLT3	0
CGAS	0
ALOX15B	0
AKR1C1	0
TFR2	-0.112794
SIAH2	0.0627429
